## **Environmental enrichment mitigates the long-lasting sequelae of perinatal fentanyl exposure**

Jason Bondoc Alipio<sup>1\*</sup>, Lace Marie Riggs<sup>2\*</sup>, Madeline Plank<sup>1</sup>, Asaf Keller<sup>1</sup>

<sup>1</sup> Department of Anatomy & Neurobiology, Program in Neuroscience, University of Maryland School of Medicine, Baltimore, MD 21201

<sup>2</sup> Department of Psychiatry, Division of Translational and Basic Science, Program in Neuroscience and Training Program in Integrative Membrane Biology, University of Maryland School of Medicine, Baltimore, MD 21201

\* Authors contributed equally to this study

Corresponding Author: Asaf Keller, Department of Anatomy & Neurobiology, University of Maryland School of Medicine, 20 Penn Street, Baltimore, MD 21201, [akeller@som.umaryland.edu](mailto:akeller@som.umaryland.edu)

Biological Sciences

## Abstract

The opioid epidemic is a rapidly evolving societal issue that stems from the abuse of prescription and illicit opioids, including increasing use of synthetic opioids like fentanyl. Fentanyl use among women has increased substantially in the last decade, leading to a 40-fold increase in the number of perinatally-exposed infants. This exposure can result in neuropsychiatric abnormalities that persist into adolescence and, in some cases, adulthood. We previously developed a preclinical model to establish the consequences of perinatal fentanyl exposure and identified a pattern of synaptic pathophysiology that involves lasting impairments in primary somatosensory (S1) circuit function and behavior. Here, we ask if these long-lasting effects can be restored by a non-invasive intervention. We demonstrate that developmental exposure to environmental enrichment ameliorates many of fentanyl's deleterious behavioral effects, including hyperactivity, enhanced sensitivity to anxiogenic environments, and sensory maladaptation. As an extension of our past work, we found that perinatal fentanyl alters the frequency of miniature excitatory postsynaptic currents and impairs long-term potentiation in S1 layer 2/3 neurons. These deficits in synaptic function were restored by environmental enrichment. Environmental enrichment also affected neurons in control mice, reducing long-term potentiation and depression, and increasing frequency of miniature excitatory postsynaptic currents. These results demonstrate that the lasting somatosensory-related effects of fentanyl can be ameliorated with a non-invasive intervention introduced during early development. These findings can inform ongoing efforts to develop actionable steps toward mitigating the consequences of opioid abuse among pregnant women.

**Keywords:** Perinatal opioid exposure; fentanyl; environmental enrichment; plasticity; somatosensory cortex; anxiety; attention deficit hyperactivity disorder; adolescence; intervention

## Significance Statement

Children and adolescents exposed to opioids during perinatal development have a higher risk of developing neuropsychiatric disorders. Here, we employ a preclinical model of perinatal fentanyl exposure that recapitulates these long-term impairments and show, for the first time, that environmental enrichment can reverse deficits in somatosensory circuit function and behavior when introduced early in postnatal development. These findings have the potential to directly inform and guide ongoing efforts to mitigate the consequences of perinatal opioid exposure.

## Introduction

The prevalence of opioid use disorder has steadily increased since the early 1990s, with women representing more than one-third of opioid users in the United States (1). While opioid overdose deaths were initially driven by misuse of prescription opioids (like morphine) and their illicit counterparts (e.g., heroin), synthetic opioids, such as fentanyl, are now the main catalyst of overdose deaths (2, 3). Just among women 30-34 years of age, the rate of these overdose deaths have increased 35-fold in the last two decades (from 0.31 to 11 deaths per 100,000; , 4) which has led to a 400% increase in the number of infants born to opioid-using mothers (from 1.5 to 6.5 per 1000 infants born; , 5). Opioid use during pregnancy increases the risk of miscarriage, premature birth, and stillbirth (6) whereas the infants who are born suffer from neonatal opioid withdrawal syndrome(NOWS; 7). Often, NOWS is met with morphine, methadone, and buprenorphine treatment immediately after birth (8), likely further compounding the developmental consequences of perinatal opioid exposure itself. For instance, *in utero* and iatrogenic opioid exposure leads to aberrant emotional (9–11) and sensory processing (12, 13), which increases the incidence of anxiety, depression, attention-deficit hyperactivity, and autism spectrum disorders in these children (14–16). While infants suffering from NOWS typically receive treatment for the acute symptoms of opioid withdrawal, there is virtually no treatment approaches specifically designed to address the other neurodevelopmental consequences that these children face across their lifetime.

Environmental enrichment in rodents can reverse early neurodevelopmental insults (17) and improve cognitive (18, 19) and emotional functioning later in life (20). This is due in part to the restoration of synaptic plasticity (21) and neurogenesis (22), which are believed to re-establish neuronal complexity (23) via brain-derived neurotrophic factor signaling (24). While the synaptic benefits of environmental enrichment are often ascribed to its actions within corticolimbic circuitry, some of the most fundamental studies to establish its importance to synaptic efficacy took place within the somatosensory cortex (25). We previously showed that perinatal fentanyl exposure increases anxiety-like behavior and impairs synaptic transmission in anterior cingulate- and primary somatosensory (S1) cortex (26, 27). Because environmental enrichment can reduce anxiety-like behavior and restore the functional integrity of cortical circuits (20, 23), we hypothesized that environmental enrichment would restore the behavioral and synaptic deficits of perinatal fentanyl exposure.

## Materials and Methods

**Animals.** All procedures were reviewed and approved by the University of Maryland Institutional Animal Care and Use Committee and adhered to the National Institutes of Health guide for the care and use of laboratory animals and Animal Research Reporting of In Vivo Experiments guidelines. Male and female C57BL/6J mice were used and bred in our temperature and humidity-controlled vivarium. When copulatory plugs were identified, we removed the sires and added fentanyl (10 µg/mL in 2% saccharin) or vehicle control (2% saccharin) to the water hydration pouches for *ad libitum* access by dams. Offspring were weaned at postnatal day (PD) 21 and housed 2-5 mice/cage/sex in standard housing, or 6-8 mice/cage/sex in enriched housing. Enriched housing was

custom made from two One Cage 2100™ Micro-Isolator systems (Lab Products LLC, Seaford, DE). Enriched housing had a floor area of 420 in<sup>2</sup> and included a variety of solid items for the mice to interact with (Fig 1. and Table 1). Food and water were available *ad libitum* and lights were maintained on a 12-hour cycle (0700 lights-on). Mice were tested in the open field test on PD 45 and in the tactile withdrawal test on PD 47. Slice experiments took place from PD 48-55.

**Statistical Analyses.** We adhered to accepted standards for rigorous study design and reporting to maximize the reproducibility and translational potential of our findings as described in Landis et al. (28) and in ARRIVE Guidelines (29). Dams were randomly allocated to receive fentanyl or vehicle. In all our experiments, the primary end of points were prospectively defined for each experiment. All experimenters were blind to treatment conditions throughout data collection, scoring, and analysis. Statistical analyses were conducted using Prism v9 (GraphPad, San Diego, CA) and the minimum sample size was determined using G\*Power Software Suite (Heinrich-Heine, Universität Düsseldorf). Statistical significance was defined as  $p < 0.05$ . No significant sex differences were observed for any of the experimental outcomes, thus, data from male and female mice were combined. There were no differences between mice of different litters within the same drug exposure group, therefore, individual mice served as a single sample count. For electrophysiology data, all neurons from a single mouse were averaged and served as a single sample count (30). Student's *t*-tests were used for two-group comparisons and the effect size was determined using Cohen's *d* and defined as small ( $\leq 0.2$ ), medium ( $\leq 0.5$ ), or large ( $\geq 0.8$ ). Two-way analysis of variance (ANOVA) was used when drug condition (vehicle vs. fentanyl) and housing condition (standard vs. enriched) were independent variables. Three-way repeated-measures ANOVA was used when drug condition, housing condition, and time (repeated-measure) were independent variables. When a significant main effect and/or interaction was observed, Tukey *post-hoc* tests were used to assess pairwise comparisons and partial eta squared ( $\eta^2$ ) was used to determine if the effect size of the comparison was small ( $\leq 0.01$ ), medium ( $\leq 0.06$ ), or large ( $\geq 0.14$ ). Fisher's exact tests were used for contingency occurrence of plasticity (LTP vs. no LTP; LTD vs. no LTD) and *odds ratio* was used to determine if the effect size was small ( $\leq 1.49$ ), medium ( $\leq 3.45$ ), or large ( $\geq 9$ ). Kruskal-Wallis tests were used for cumulative probability plots and  $\eta^2$  was used to determine effect size of those comparisons. Nonparametric alternatives were used if the data did not pass Spearman's test for heteroscedasticity and D'Agostino-Pearson omnibus K2 test of distribution normality. For two-group nonparametric comparisons, Glass' *delta* or Hedges' *g* were used to determine if the effect size was small ( $\leq 0.2$ ), medium ( $\leq 0.5$ ), or large ( $\geq 0.8$ ) whereas  $\eta^2$  was used to determine the effect size when three or more groups were being compared.

**Open Field Test** was used to assess general locomotor activity and anxiety-like behavior. Mice habituated to the testing room for at least 1-hr before the testing session began. Mice were individually placed in an open field arena (49 × 49 × 49 cm; San Diego Instruments, San Diego, CA) along the outside edge, facing the wall, and were allowed to freely explore the chamber for 30-min. The testing room was dimly lit with warm incandescent floor lamps and the center floor of the chamber read ~30 lux. The test was recorded by an overhead digital camera, and distance traveled (cm) and time

spent in the center (defined as 50% of the center area) were automatically scored using TopScan Software (CleverSys Inc, Reston, VA). Reduced time spent in the center zone of the arena is considered an anxiety-like response in this task.

*Tactile Hind Paw Withdrawal Test* was used to assess sensory threshold and adaptation. Mice habituated to the testing room for at least 1-hr before the testing session began, and were habituated to an elevated clear plexiglass box with a mesh bottom for 10 min. We applied von Frey filaments of increasing forces (in grams: 0.16, 0.40, 0.60, 1.00, 1.40, 2.00) to the plantar surface of the hind paw. A response was defined as an active withdrawal of the paw from the probing filament. The filament was applied to the same paw throughout the test. We used the up-down method to determine withdrawal threshold, as previously described (31–33). To assess sensory adaptation, we applied a von Frey filament one step above threshold to the plantar surface of the hind paw, opposite to the hind paw used during tactile sensitivity testing. The filament was applied once every 30 s until the animal stopped responding. The number of times the animals responded was counted, with persistent responding to tactile stimulation indicating sensory maladaptation.

*Drugs and Solutions.* Dams' water hydration pouches contained either 10 µg/mL fentanyl citrate (calculated as free base) in 2% (w/v) saccharin or 2% saccharin (vehicle control), replenished weekly until litters were weaned on PD 21. Artificial cerebrospinal fluid (ACSF) compositions and slice preparations were based on slice collection methods of Ting et al. (34). *N*-methyl-D-glucamine (NMDG) ACSF contained (in mM): 92 NMDG, 30 NaHCO<sub>3</sub>, 20 HEPES, 25 glucose, 5 Na-ascorbate, 2 thiourea, 1.25 NaH<sub>2</sub>PO<sub>4</sub>, 2.5 KCl, 3 Na-pyruvate, 0.5 CaCl<sub>2</sub>·2H<sub>2</sub>O and 10 MgSO<sub>4</sub>·7H<sub>2</sub>O. Holding ACSF contained (in mM): 120 NaCl, 2.5 KCl, 1.25 NaH<sub>2</sub>PO<sub>4</sub>, 24 NaHCO<sub>3</sub>, 12.5 glucose, 2 MgSO<sub>4</sub>·7H<sub>2</sub>O, and 2 CaCl<sub>2</sub>·2H<sub>2</sub>O. Recording ACSF contained (in mM): 120 NaCl, 3 KCl, 1 NaH<sub>2</sub>PO<sub>4</sub>, 25 NaHCO<sub>3</sub>, 20 glucose, 1.5 MgSO<sub>4</sub>·7H<sub>2</sub>O, and 2.5 CaCl<sub>2</sub>·2H<sub>2</sub>O. ACSF pH was adjusted to 7.4 and osmolarity to 305 ± 2 mOsm. All ACSF solutions were saturated with carbogen (95% O<sub>2</sub> and 5% CO<sub>2</sub>). Patch pipettes contained (in mM): 130 cesium methanesulfonate, 10 HEPES, 1 magnesium chloride, 2.5 ATP-Mg, 0.5 EGTA, 0.2 GTP-Tris, 5 QX-314, and 2% biocytin. The pH of the internal pipette solution was adjusted to 7.3 and osmolarity to 290 ± 2 mOsm. To isolate excitatory postsynaptic currents (EPSCs), gabazine (1 µM) was included in the ACSF. For miniature EPSC (mEPSC) recordings, tetrodotoxin (1 µM) was included in the ACSF. All recordings were obtained at room temperature. Data acquisition was performed using Clampex and analyzed with Clampfit (Molecular Devices). Mini Analysis software (Synaptosoft) was used to analyze mEPSC recordings.

*Slice Preparation.* Mice were deeply anesthetized with intraperitoneal injection of ketamine (180 mg/kg) and xylazine (20 mg/kg) then transcardially perfused with ice-cold (4 °C) NMDG ACSF. Their brains were rapidly extracted following decapitation. Coronal slices (300 µm thick) containing the primary somatosensory cortex (S1) were cut in ice-cold (4 °C) NMDG ACSF using a Leica VT1200s vibratome (Leica Biosystems, Buffalo Grove, IL) and transferred to warm (33 °C) NMDG ACSF for 10 min. The slices were then transferred to warm (33 °C) holding ACSF and allowed to cool to room temperature (20–22 °C) for at least 45 min before electrophysiology recordings.



**Electrophysiology.** Whole cell patch-clamp recordings were obtained from S1 layer 2/3 neurons with a Multiclamp 700B amplifier (Molecular Devices, San Jose, CA) low-pass filtered at 1.8 kHz with a four-pole Bessel filter, and digitized with a Digidata 1440A (Molecular Devices, San Jose, CA). Slices were placed in a submersion chamber and continually perfused (> 2 mL/min) with recording ACSF. Neurons were visually identified by infrared differential interference contrast imaging and location and neuronal morphology verified after each recording with biocytin immunohistochemistry. Borosilicate patch pipettes had an impedance of 4-6 MΩ. Once GΩ seal was obtained, neurons were held in voltage-clamp configuration at -70 mV and the input resistance, resting membrane potential, and capacitance were measured. Series resistance (< 30 MΩ) was monitored throughout recordings and recordings were discarded if series resistance changed by >20% from baseline. Concentric bipolar tungsten electrodes were used to deliver electrical stimulation (0.2 ms duration) in S1 layer 5, below the recorded neuron. Electrically-evoked current responses were recorded at 1.5-fold threshold, defined as the minimum stimulation intensity required to produce a visible current response beyond baseline noise.

Long-term potentiation (LTP) was induced using a pairing induction protocol: 80 stimulation pulses at 2 Hz paired with postsynaptic depolarization to +30 mV (35, 36). Long-term depression (LTD) was induced using low frequency stimulation: 900 stimulation pulses at 1 Hz. The occurrence of LTP or LTD was assessed by comparing the average EPSC amplitude from 5-10 min of the baseline to 25-30 min after the plasticity induction protocol. EPSC responses to electrically evoked paired pulse stimulation (50 ms intervals) were recorded after the 10 min baseline and again 30 min after the plasticity induction protocol. The paired pulse ratio (PPR) was obtained by averaging the mean amplitude of the second EPSC by that of the first (37). To control for oversampling and unequal sample size between groups, we performed quantile sampling of mEPSC frequency and amplitude by computing 29 evenly spaced quantile values from each neuron, starting at the 1<sup>st</sup> percentile and ending at the 94.2<sup>th</sup> percentile, with a step size of 3.33% (38).

## Results

### Perinatal fentanyl exposure

We administered fentanyl citrate (10 µg/mL) in the drinking water of pregnant mouse dams throughout their pregnancy and until their litters were weaned at postnatal day (PD) 21 (Fig. 1A). We chose 10 µg/ml since it is the optimal concentration mice will readily self-administer without producing motor deficits (39, 40) and is well below the mouse oral LD50 (fentanyl citrate MSDS, Cayman Chemical, Ann Arbor, MI). We have recently found that perinatal treatment with 10 µg/ml results in behavioral and synaptic deficits in adolescent mice (27). Offspring were weaned into either standard or enriched housing environments (Fig. 1, Table 1).

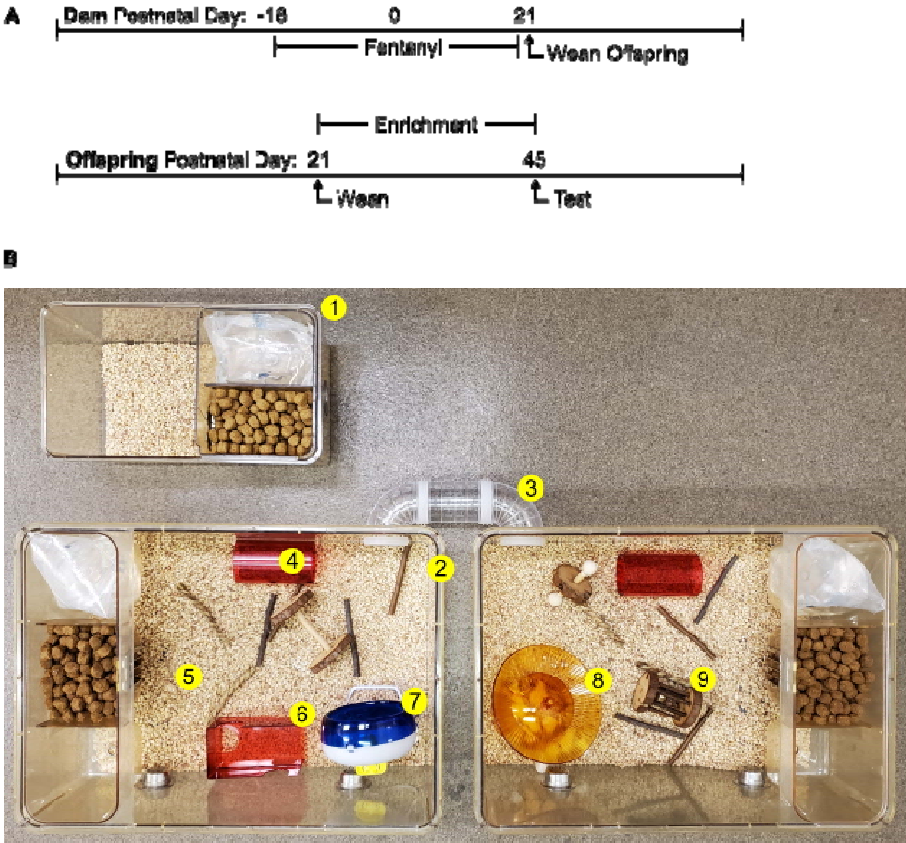

**Figure 1. Experimental timeline of exposure to perinatal fentanyl and postnatal housing conditions.** (A) Timeline depicting fentanyl exposure of mouse dams throughout pregnancy until weaning of offspring on postnatal day (PD) 21. (B) Offspring were weaned into standard (top cage) or enriched (bottom cage) housing conditions until behavioral (PD 45/47) and electrophysiological (PD 48-55) analyses took place. Enrichment items are numbered (1-9) and listed in Table 1.

**Table 1** Product information for individual housing items

| Item | Description                      | Product Info                     | Company           |
|------|----------------------------------|----------------------------------|-------------------|
| 1    | Standard housing                 | Mouse 750™ ventilated cage       | Lab Products      |
| 2    | Environmental enrichment housing | One Cage 2100™                   | Lab Products      |
| 3    | Connecting tunnel                | DIY clear tunnel                 | POPETPOP          |
| 4    | Tunnel                           | Bio-Serv™ Mouse Tunnel           | Fisher Scientific |
| 5    | 1" deep bedding                  | Corn Cob Bedding                 | Lab Supply        |
| 6    | Platform                         | Bio-Serv™ Mouse Retreat          | Fisher Scientific |
| 7    | Standing running wheel           | Silent Spinner Wheel 4.5"        | Kaytee            |
| 8    | Dome and plate running wheel     | Bio-Serv™ InnoDome and InnoWheel | Fisher Scientific |
| 9    | Variety chew toys                | Small animal chew toys           | Niteangel         |

**Environmental enrichment reverses the sustained behavioral deficits that are induced by perinatal fentanyl exposure**

**Hyperactivity.** We used the open field test (Fig. 2A) to examine general locomotor behavior of adolescent mice perinatally exposed to either vehicle or fentanyl, raised in either standard or an enriched housing environment (Fig. 2B-C;  $n = 15$ -20 mice per group). All mice habituated to the open field over time, in that distance traveled progressively decreased over the course of the procedure (Fig. 2B;  $F(3.7, 233.7) = 119.70$ ,  $p < 10^{-4}$ ,  $P\eta^2 = 0.65$ , *large-effect*). There was a significant time  $\times$  drug (Three-way ANOVA,  $F(5, 310) = 6.69$ ,  $p < 10^{-4}$ ,  $P\eta^2 = 0.09$ , *medium-effect*) and drug  $\times$  housing interaction ( $F(1, 62) = 7.07$ ,  $p = 0.009$ ,  $P\eta^2 = 0.10$ , *medium-effect*). There was a significant drug  $\times$  housing interaction in total distance traveled (Fig. 2C; Two-way ANOVA,  $F(1, 62) = 7.07$ ,  $p = 0.01$ ,  $P\eta^2 = 0.10$ , *medium-effect*), with fentanyl-exposed, standard-housed mice exhibiting higher total distance traveled than vehicle-exposed, standard-housed mice (Tukey's post hoc,  $p = 0.01$ , Cohen's  $d = 1.23$ , *large-effect*). While environmental enrichment did not influence locomotor behavior on its own (i.e., in vehicle-exposed mice; Tukey's post hoc,  $p = 0.97$ ), it attenuated the hyperactivity of mice perinatally exposed to fentanyl (Tukey's post hoc,  $p = 0.007$ , Cohen's  $d = 1.58$ , *large-effect*). These data suggest that perinatal fentanyl exposure leads to hyperactivity and that environmental enrichment can reverse this effect without itself perturbing locomotor behavior.

**Anxiety-like behavior.** To test our prediction that environmental enrichment will attenuate anxiety-like behavior, we assessed time spent in the center zone during the open field test (Fig. 2D;  $n = 15$ -20 mice per group; Kruskal-Wallis test,  $H = 10.17$ ,  $p = 0.01$ ,  $P\eta^2 = 0.01$ , *small-effect*). Fentanyl-exposed, standard-housed mice spent less time in the center zone than did vehicle-exposed, standard-housed mice (Dunn's post hoc,  $p = 0.02$ , Glass'  $\delta = 0.79$ , *medium-effect*), and this, too, was selectively reversed by environmental enrichment (Dunn's post hoc,  $p = 0.004$ , Glass'  $\delta = 0.88$ , *large-effect*). The observation that enrichment improves center-zone exploration of fentanyl-exposed mice is notable, given the sustained hyperlocomotor/anxiogenic effect induced by fentanyl under standard-housing conditions. This is further evidenced by fentanyl-exposed, standard-housed mice spending less time in the center zone over the course of the procedure relative to their enriched-housed fentanyl-exposed counterparts (Fig. 2E; Kruskal-Wallis test,  $H = 14.80$ ,  $p = 0.002$ ,  $P\eta^2 = 0.01$ , *small-effect*; Dunn's post hoc,  $p = 0.01$ , Glass'  $\delta = 1.15$ , *large-effect*), with the hyperlocomotor phenotype promoting center zone entries among fentanyl-exposed, standard-housed. These data suggest that environmental enrichment reduces anxiety-like behavior in adolescent mice that were perinatally exposed to fentanyl.

**Sensory adaptation.** We tested sensory adaptation, a reduction in sensitivity to repeated stimuli, by applying von Frey filaments to the plantar surface of the hind paw (Fig. 2F-H;  $n = 11$ -19 mice per group). To test whether mice can sense tactile stimuli, we assessed hind paw withdrawal to threshold stimulation (Fig. 2G). There was no interaction nor main effect of drug and housing condition on paw withdraw threshold, suggesting that all mice similarly perceive tactile stimuli (Kruskal-Wallis test,  $H = 6.80$ ,  $p = 0.07$ ). Next, we tested whether mice adapt to repeated application of von Frey filaments above their threshold hind paw withdrawal response (Fig. 2H). There was a significant drug  $\times$  housing interaction (Two-way ANOVA,  $F(1, 54) = 56.27$ ,  $p < 10^{-4}$ ,  $P\eta^2 = 0.51$ , *large-effect*). Fentanyl-exposed, standard-housed mice continued to respond to



the stimuli more than twice as much as vehicle-exposed, standard-housed mice (Tukey's post hoc,  $p < 10^{-4}$ , Glass' delta = 4.31, *large-effect*). Enriched housing completely reversed this sensory maladaptation (Tukey's post hoc,  $p < 10^{-4}$ , Glass' delta = 6.22, *large-effect*). These data suggest that perinatal fentanyl exposure leads to a sustained impairment in tactile sensory adaptation that can be reversed by environmental enrichment. Notably, while perinatal fentanyl exposure promotes hyperactivity and anxiety-like behavior relative to vehicle-exposed mice with large and medium effect, respectively, its influence on sensory adaptation was larger. These data suggest that fentanyl leads to an enduring sequelae of behavioral changes that can be fully reversed by environmental enrichment, with sensory maladaptation possibly being among the most prominent changes induced by perinatal opioid exposure.

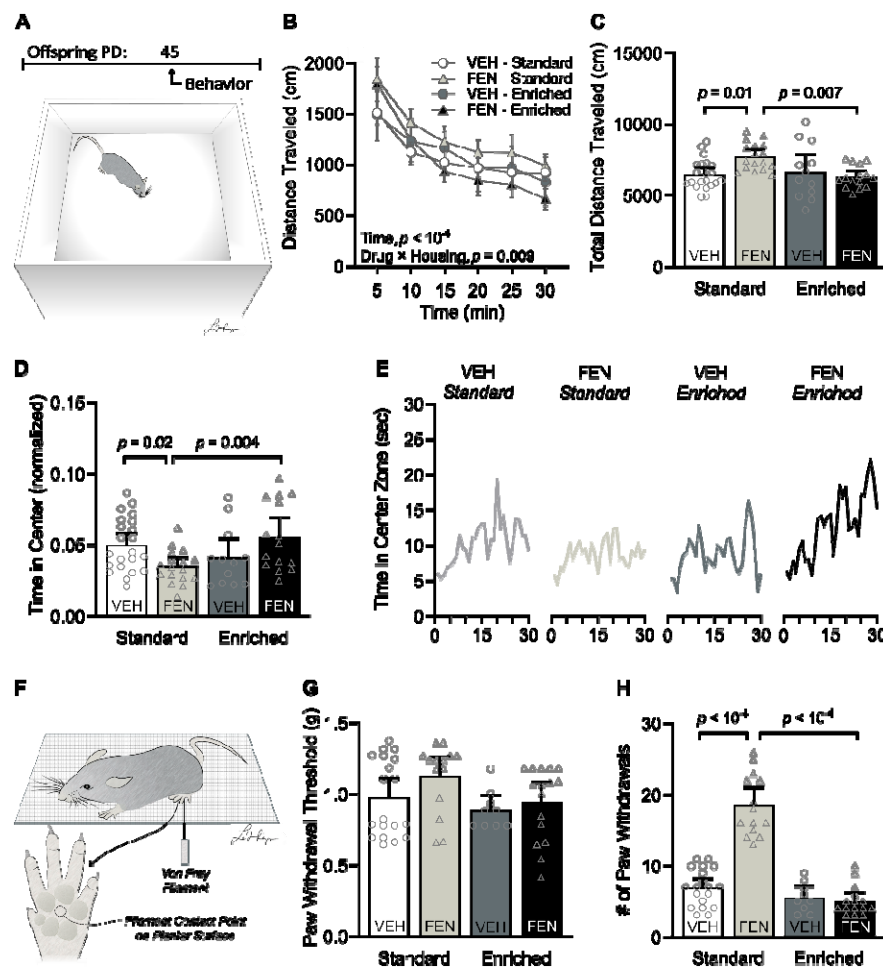

**Figure 2. Environmental enrichment reverses the sustained behavioral deficits that are induced by perinatal fentanyl exposure.** (A) Timeline depicting behavioral assays and a schematic of the open field test.  $n = 15$ -20 mice per group. (B, C) Perinatal fentanyl exposure increases distance traveled across time. (D, E) Perinatal fentanyl exposed mice raised with environmental enrichment have comparable distance traveled with vehicle controls but spend less time in the center area of the open field. Fentanyl-exposed mice raised with environmental enrichment spend more time in the center area of the open field, comparable to vehicle controls. (F) Graphic depicting von Frey tactile stimulation on the plantar surface of the hind paw. (G) There were no differences across groups in the paw withdrawal threshold to tactile stimulation.  $n = 11$ -19 mice per group. (H) Standard housed fentanyl exposed mice have a higher number of paw withdrawal responses to repeated stimuli than standard housed vehicle mice. Fentanyl exposed mice raised with environmental enrichment have a lower number of paw withdrawal responses, comparable to vehicle mice raised in standard and enriched environment. Data depict means,  $p$  values, and 95% confidence intervals.

## Environmental enrichment restores long-term potentiation in S1 layer 2/3 neurons after perinatal fentanyl exposure

The fentanyl-induced impairment in sensory adaptation, as well as its reversal by environmental enrichment, suggests that these changes may be associated with altered synaptic plasticity in somatosensory cortex (S1). To test this, we assessed whether perinatal fentanyl exposure influenced long-term potentiation (LTP) of excitatory postsynaptic currents (EPSCs) in S1 layer 2/3 neurons (Fig. 3;  $n = 6$ -9 mice/group, 1 neuron/mouse).

LTP was readily induced in S1 layer 2/3 neurons from vehicle-exposed, standard-housed mice (Fig. 3A). Amplitudes of evoked EPSCs were higher 30 min after the LTP paired induction protocol (80 electrical stimulation pulses at 2 Hz paired with postsynaptic depolarization to +30 mV) relative to baseline (Wilcoxon matched-pairs signed rank test,  $p = 0.01$ , Glass' delta = 18.27, *large-effect*). In contrast, neurons from fentanyl-exposed, standard-housed mice did not exhibit LTP, and instead showed a long-term depression (LTD)-like effect with significantly reduced EPSC amplitudes relative to baseline (Fig. 3B; Wilcoxon matched-pairs signed rank test,  $p = 0.01$ , Glass' delta = 3.88, *large-effect*). In vehicle-exposed mice raised with environmental enrichment, the induction parameters tested here failed to evoke a statistically significant change in EPSC amplitude from baseline (Fig. 3C; Wilcoxon matched pairs signed rank test,  $p = 0.06$ ). In fentanyl-exposed mice raised with environmental enrichment, the LTP-induction protocol produced a short-lasting potentiation about 15-20 min, but EPSC amplitude was not significantly different from baseline by 25-30 min post-induction (Fig. 3D; Wilcoxon matched-pairs signed rank test,  $p = 0.16$ ).

Consistent with these within-group comparisons, between-group comparisons revealed a complete block of LTP in neurons from fentanyl-exposed, standard-housed mice and a partial restoration of LTP by environmental enrichment (Fig. 3E). There was a significant drug  $\times$  housing interaction (Two-way ANOVA,  $F(1, 26) = 15.68$ ,  $p < 10^{-3}$ ,  $\eta^2 = 0.37$ , *large-effect*). Neurons from fentanyl-exposed, standard-housed mice had lower post-LTP EPSC amplitudes than their vehicle-exposed, standard-housed counterparts (Tukey's post hoc,  $p < 10^{-4}$ , Cohen's  $d = 3.12$ , *large-effect*). Fentanyl-exposed, enriched-housed mice had higher post-LTP EPSC amplitudes relative to fentanyl-exposed, standard-housed mice (Tukey's post hoc,  $p = 0.03$ , Cohen's  $d = 1.40$ , *large-effect*). However, the paired induction protocol used in the current study did not induce LTP in neurons from vehicle-exposed, enriched-housed mice (*see Discussion*; Tukey's post hoc,  $p = 0.05$ ).

When quantifying the proportion of neurons that exhibited LTP, we found that while nearly all neurons from vehicle-exposed, standard-housed mice exhibited LTP (Fig. 3F; 6/7 neurons, 85.7%), none of the neurons from fentanyl-exposed, standard-housed mice exhibited LTP (0/7 neurons, 0%). About half of the neurons from fentanyl-exposed, enriched-housed mice (5/9 neurons, 55.55%), and from vehicle-exposed, enriched-housed mice (3/6 neurons, 50%). Between-group comparisons further indicate that fentanyl-exposed, standard-housed mice had a lower occurrence of LTP than vehicle-exposed, standard-housed mice (Fisher's exact test,  $p = 0.01$ , *odds ratio* = 42, *large-effect*) and that environmental enrichment increased the proportion of neurons that exhibit LTP in fentanyl-exposed mice compared to fentanyl-exposed, standard-housed mice (Fisher's exact test,  $p = 0.03$ , *odds ratio* = 8.75, *medium-effect*). These data demonstrate that perinatal fentanyl exposure impairs LTP in S1 layer 2/3 neurons from mice raised under standard housing conditions, and that environmental enrichment can restore LTP in a subset of these neurons. Neurons from control mice raised in an enriched environment exhibit an attenuated and lower occurrence of LTP relative to standard housing conditions, which may suggest an occlusive effect of enrichment on synaptic plasticity.

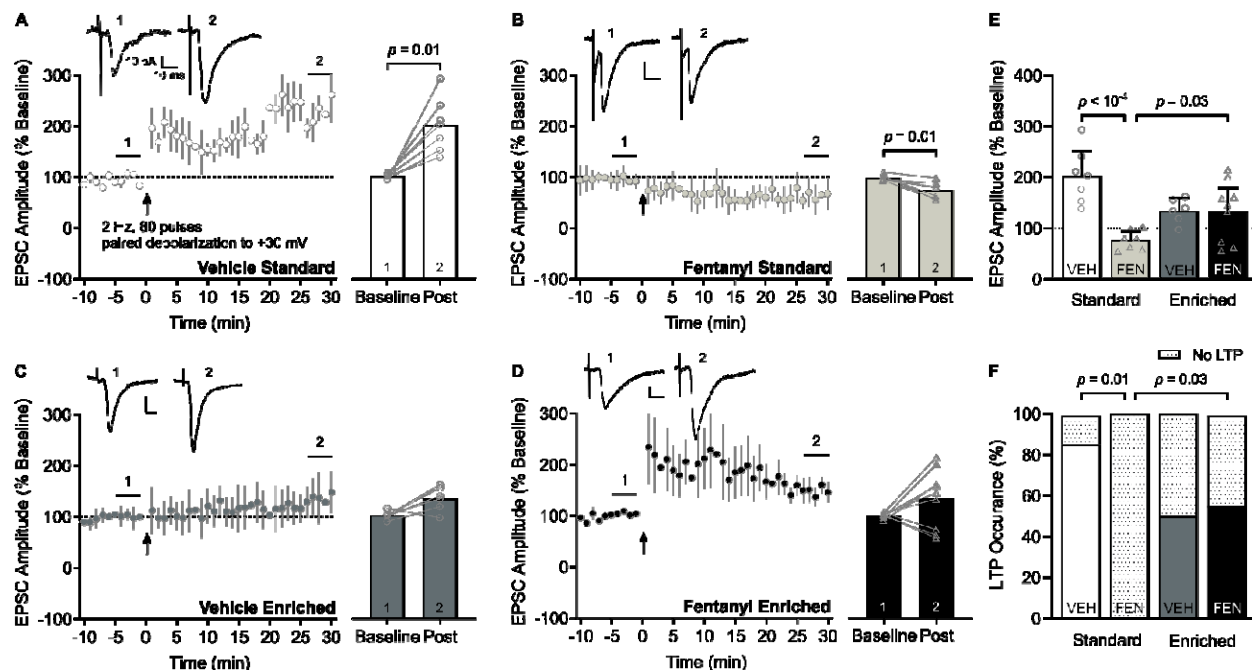

**Figure 3. Environmental enrichment restores long-term potentiation in S1 layer 2/3 neurons after perinatal fentanyl exposure (A-D)** Time course (left) of long-term potentiation (LTP) of excitatory postsynaptic currents (EPSCs) following paired induction (80 electrical stimulation pulses at 2 Hz paired with postsynaptic depolarization to +30 mV). Bar graphs (right) show group data comparing EPSC amplitudes at baseline (1) and at 25-30 min after LTP induction (2). Insets depict sample traces from times indicated on time course graph. **(A)** Within-group comparisons indicate LTP was induced in S1 layer 2/3 neurons from vehicle-exposed, standard-housed mice. **(B)** LTP paired induction parameters induced long-term depression (LTD) of the EPSC in fentanyl-exposed, standard-housed mice. **(C)** Data from vehicle-exposed, enriched-housed mice and **(D)** fentanyl-exposed, enriched-housed mice indicate no differences in EPSCs at baseline to post LTP induction. **(E)** Between-group comparisons of the EPSC amplitudes post LTP induction. Fentanyl-exposed, standard-housed mice had lower EPSC amplitudes than vehicle-exposed, standard-housed mice. Environmental enrichment increased the EPSC amplitude of fentanyl-exposed, enriched-housed mice, relative to their fentanyl-exposed, standard-housed counterparts. **(F)** Between-group comparisons indicate fentanyl-exposed, standard-housed mice had a lower occurrence of neurons that exhibit LTP than vehicle-exposed, standard-housed mice. Raising fentanyl-exposed mice in environmental enrichment increased the proportion of neurons that exhibit LTP.  $n = 6-9$  mice/group, 1 neuron/mouse. Data depict means,  $p$  values, and 95% confidence intervals.

### Environmental enrichment suppresses long-term depression

We assessed whether perinatal fentanyl exposure influenced LTD of EPSCs in S1 layer 2/3 neurons and the impact of environmental enrichment on these changes (Fig. 4;  $n = 5-6$  mice/group, 1 neuron/mouse). LTD of EPSC amplitudes were evident following low-

frequency electrical stimulation (900 stimuli, 1 Hz) in S1 layer 2/3 neurons from vehicle-exposed, standard-housed mice (Fig. 4A; Wilcoxon matched-pairs signed rank test,  $p = 0.06$ , Glass'  $\delta = 9.76$ , *large-effect*) and in fentanyl-exposed, standard-housed mice (Fig. 4B; Wilcoxon matched-pairs signed rank test,  $p = 0.03$ , Glass'  $\delta = 40.11$ , *large-effect*). However, LTD was not induced in neurons from vehicle-exposed mice raised in an enriched environment (Fig. 4C; Wilcoxon matched-pairs signed rank test,  $p = 0.12$ ). In contrast, LTD was readily induced in fentanyl-exposed, enriched-housed mice (Fig. 4D; Wilcoxon matched-pairs signed rank test,  $p = 0.03$ , Glass'  $\delta = 6.46$ , *large-effect*).

Consistent with this, between-group comparisons of post-LTD EPSC amplitudes revealed a significant drug  $\times$  housing interaction (Fig. 4E; Two-way ANOVA,  $F(1, 18) = 5.86$ ,  $p = 0.02$ ,  $\eta^2 = 0.24$ , *large-effect*) with greater LTD in neurons from vehicle-exposed, standard-housed mice, relative to vehicle-exposed, enriched-housed mice (Tukey's post hoc,  $p = 0.006$ , Cohen's  $d = 5.26$ , *large-effect*). All neurons from vehicle-exposed standard-housed mice exhibited LTD (5/5 neurons) whereas only 20% of neurons from vehicle-exposed, enriched-housed mice exhibited LTD (Fig. 4F; 1/5 neurons; Fisher's exact test,  $p = 0.04$ , *odds ratio = 40*, *large-effect*). Most neurons from fentanyl-exposed mice exhibited LTD (5/6 neurons 83.33%) in either housing condition, respectively.

These data suggest that LTD is readily induced in S1 layer 2/3 neurons of mice raised in standard, conventional cages, but not in neurons from mice raised in an enriched environment. The data also indicate that perinatal fentanyl exposure does not appear to affect LTD induction or expression, regardless of housing conditions.

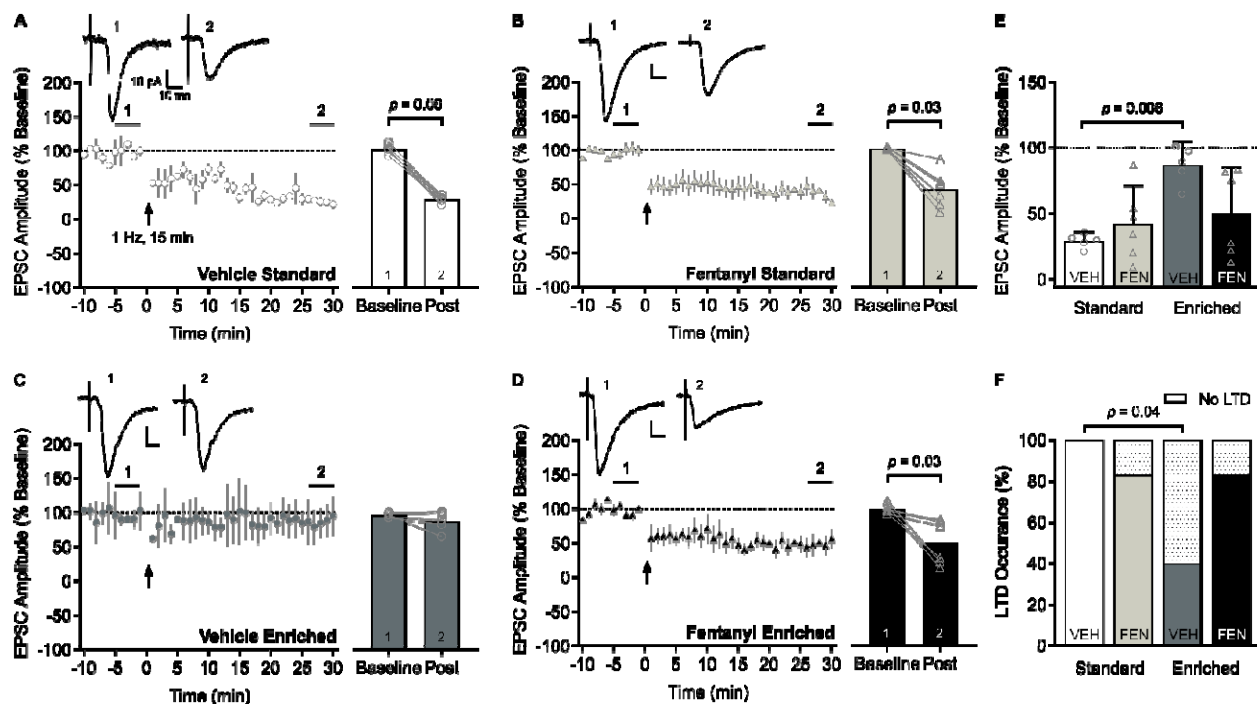



**Figure 4. Environmental enrichment suppresses long-term depression. (A-D)** Time course (left) of long-term depression (LTD) of excitatory postsynaptic currents (EPSCs) following low frequency stimulation (900 electrical stimulation pulses at 1 Hz). Bar graphs (right) show group data comparing EPSC amplitudes at baseline (1) and at 25-30 min after LTD induction (2). Insets depict sample traces from times indicated on time course graph. **(A)** Within-group comparisons indicate LTD was induced in S1 layer 2/3 neurons from vehicle-exposed, standard-housed mice and in **(B)** fentanyl-exposed, standard-housed mice. **(C)** LTD was not induced in vehicle-exposed, enriched-housed mice, but was in **(D)** fentanyl-exposed, enriched-housed mice. **(E)** Between-group comparisons of the EPSC amplitudes post-LTD induction indicate that vehicle-exposed, enriched-housed mice failed to induce LTD compared to their vehicle-exposed, standard-housed counterparts. **(F)** Between-group comparisons of the occurrence of LTD indicate vehicle-exposed, enriched-housed mice had a lower occurrence of neurons that exhibit LTD than vehicle-exposed, standard-housed mice.  $n = 5-6$  mice/group, 1 neuron/mouse. Data depict means,  $p$  values, and 95% confidence intervals.

### **Evoked glutamate release probability is not influenced by perinatal fentanyl exposure or environmental enrichment**

We assessed paired pulse ratios (PPRs) to determine if the changes in plasticity induced by perinatal fentanyl exposure and environmental enrichment were mediated by presynaptic changes in vesicle release probability (Fig. 5). Figure 5A depicts sample traces from each of the experimental groups. Before LTP/LTD induction, there were no differences in baseline PPR among the experimental groups (Fig. 5B;  $n = 9-12$  mice/group, 1 neuron/mouse; Kruskal-Wallis test,  $p > 0.05$ ), nor did PPR change following the induction of LTP (Fig. 5C:  $n = 4-6$  mice/group, 1 neuron/mouse; Paired  $t$ -test,  $p > 0.05$ ) or LTD (Fig. 5D:  $n = 4-6$  mice/group, 1 neuron/mouse; Paired  $t$ -test,  $p > 0.05$ ). These data suggest that neither perinatal fentanyl exposure nor environmental enrichment influence the probability of evoked glutamate release at baseline, or following induction of LTP or LTD in S1 layer 2/3 neurons with the induction protocols used in the current study.

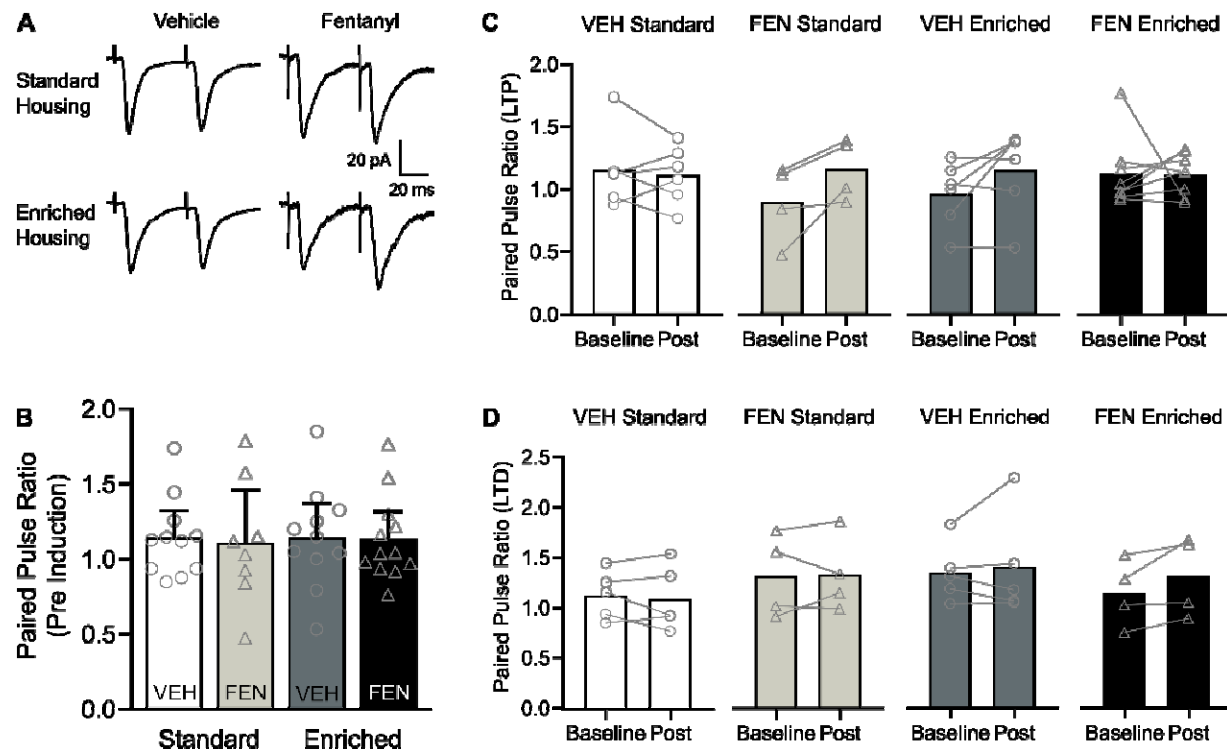

**Figure 5. Evoked glutamate release probability is not influenced by perinatal fentanyl exposure or environmental enrichment.** (A) Representative traces of EPSC responses to paired pulse stimulation. (B) There were no differences in the paired pulse ratio (PPR) between groups prior to plasticity induction ( $n = 9-12$  mice/group, 1 neuron/mouse). (C, D) Within each group, there were no differences in baseline PPR compared to PPR post-LTP or LTD induction ( $n = 4-6$  mice/group, 1 neuron/mouse). Data depict means and 95% confidence intervals.

### Environmental enrichment restores changes in mEPSC frequency induced by standard housing and perinatal fentanyl exposure

Some of the mechanisms and functions of spontaneous synaptic transmission are distinct from that of action potential-evoked synaptic transmission (41). To determine if perinatal fentanyl exposure influenced spontaneous excitatory synaptic transmission, we recorded miniature excitatory postsynaptic currents (mEPSCs) in S1 layer 2/3 neurons (Fig. 6;  $n = 6-8$  mice/group, 1-2 neurons/mouse). We averaged all events from each neuron and animal for between-group comparisons of mEPSC frequency (Fig 6B; Kruskal-Wallis test,  $H = 12.41$ ,  $p = 0.006$ ,  $P\eta^2 = 0.03$ , *medium-effect*). Neurons from vehicle-exposed, enriched-housed mice had higher mEPSC frequency than vehicle-exposed, standard-housed mice (Dunn's post hoc,  $p = 0.01$ , Glass'  $\delta = 21.00$ , *large-effect*).

Given that averaging mEPSC events can be confounded by cell-to-cell differences in vesicle release dynamics and/or postsynaptic cluster sizes (42), we further assessed

these differences in mEPSC frequency by examining their cumulative probability (Fig. 6C; Kruskal-Wallis test,  $H = 42.61$ ,  $p < 10^{-4}$ ,  $P\eta^2 < 0.008$ , *small-effect*). Since we observed measurable differences among the groups in the total number and range of release events, we used a quantile-based approach described by Hanes et al., 2020 (38) to control for these unequal distributions. Neurons from fentanyl-exposed, standard-housed mice had higher mEPSC frequency than neurons from vehicle-exposed, standard-housed mice (Dunn's post hoc,  $p < 10^{-4}$ , Glass' delta = 2.98, *large-effect*) and environmental enrichment normalized this increase in mEPSC frequency (Dunn's post hoc,  $p = 0.01$ , Glass' delta = 0.52, *medium-effect*). Environmental enrichment also enhanced mEPSC frequency in vehicle-treated conditions relative to neurons from mice raised in standard housing (Dunn's post hoc,  $p < 10^{-4}$ , Glass' delta = 3.34, *large-effect*). In contrast, there was no significant interaction nor main effect on the average (Fig. 6D; Two-way ANOVA,  $p > 0.05$ ) or cumulative probability (Fig. 6E; Kruskal-Wallis test,  $p > 0.05$ ) of mEPSC amplitudes among the groups. These data suggest that environmental enrichment establishes a higher frequency of miniature release at this synapse. However, environmental enrichment was also able to restore the aberrant increase in mEPSC frequency induced by perinatal fentanyl, which itself resembled a more quiescent state.

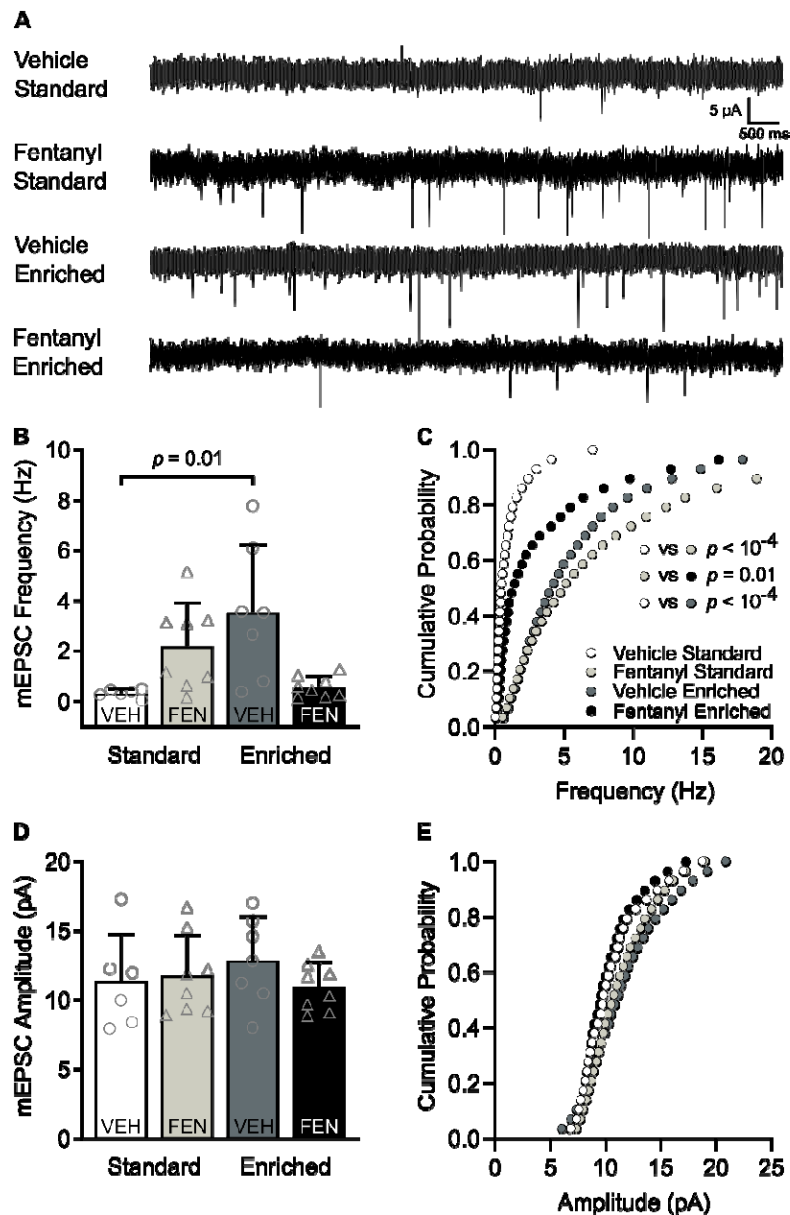

**Figure 6. Environmental enrichment restores changes in mEPSC frequency induced by standard housing and perinatal fentanyl exposure.** (A) Representative traces of miniature excitatory postsynaptic currents (mEPSCs). (B) Grouped data of the averaged events from each neuron and animal indicating that mEPSC frequency is higher after environmental enrichment, compared to controls. (C) Cumulative probability curves of the frequency suggest perinatal fentanyl exposure results in increased mEPSC frequency, and that raising fentanyl-exposed mice with environmental enrichment reverses this increase. Enrichment also increased mEPSC frequency of vehicle control mice independent of perinatal fentanyl exposure. (D, E) There were no differences in mEPSC amplitudes.  $n = 6-8$  mice/group, 1-2 neurons/mouse. Data depict means,  $p$  values, and 95% confidence intervals.

## Discussion

We hypothesized that environmental enrichment would restore the behavioral and synaptic deficits of perinatal fentanyl exposure. Consistent with our prediction, environmental enrichment attenuated the behavioral aberrations induced by perinatal fentanyl exposure, including hyperactivity, anxiety-like behavior, and sensory maladaptation. Notably, environmental enrichment restored behavioral functioning of fentanyl-exposed mice to normal levels. Enrichment also normalized the impaired excitatory synaptic transmission and long-term potentiation (LTP) in primary somatosensory (S1) layer 2/3 neurons. Notably, in naïve, control mice environmental enrichment results in attenuated LTP and long-term depression (LTD), as well as increased excitatory synaptic transmission.

### Behavior

We previously showed that perinatal fentanyl exposure results in lasting anxiety-like behavior and sensory maladaptation (26, 27). Here, we expand upon our model by showing that perinatal fentanyl exposure leads to hyperactivity, a prominent feature of attention-deficit hyperactivity disorder (43), which is often diagnosed in children that were exposed to opioids perinatally (16).

### Synaptic plasticity

Because perinatal fentanyl exposure led to impairments in sensory-related processing, we investigated changes in the efficacy of synaptic transmission in S1 layer 2/3. Whereas LTP was readily induced by pairing repeated stimuli with postsynaptic depolarization of S1 layer 2/3 neurons, this LTP induction protocol failed to induce LTP in neurons from fentanyl-exposed mice. In contrast, perinatal fentanyl exposure did not influence the induction of LTD in response to low frequency stimulation. These results are consistent with previous studies showing that prenatal exposure to morphine suppresses LTP in the dentate gyrus of juvenile rats (44, 45).

### Synaptic activity

We have previously reported that perinatal fentanyl exposure suppresses glutamate release onto S1 layer 5 neurons, and promotes glutamate release onto anterior cingulate cortex (ACC) layer 5 neurons (27). In contrast to S1 layer 5, here we find that this exposure promotes glutamate release onto S1 layer 2/3 neurons. That neurons in different cortical layers and areas express differences in the lasting effects of perinatal fentanyl exposure likely reflects differences in cortical developmental trajectory. Our data suggest that neurons that develop earlier (S1 layer 2/3 neurons) express a lasting increase in excitatory synaptic activity, whereas later developing neurons (S1 and ACC layer 5 neurons) exhibit decreased synaptic activity.

### Environmental enrichment effects on behavior

Environmental enrichment restored the hyperactivity induced by perinatal fentanyl exposure, as well as the increase in anxiety-like behavior in a novel open field environment. This is consistent with studies demonstrating that rearing rodents in an enriched environment improves maladaptive phenotypic changes in preclinical models of ADHD and anxiety (46–48). Environmental enrichment also restored the sensory



maladaptation induced by perinatal fentanyl exposure. These findings might be relevant to addressing the sensory-related deficits in children that were perinatally exposed to opioids.

Other preclinical studies have shown that environmental enrichment can ameliorate behavioral changes induced by perinatal exposure to other drugs of abuse, including nicotine, cocaine, morphine, ethanol, antiadrenergic, and antihypertensive drugs (44, 46, 49–52). These results suggest that enrichment may benefit infants and children with such exposures. Importantly, our data also support that environmental enrichment may be a favorable intervention during early development, since it does not produce untoward behavioral outcomes on its own, at least not in the behavioral outcomes assessed in the current study.

### **Environmental enrichment effects on synaptic plasticity**

Environmental enrichment restored the perinatal fentanyl exposure-induced impairment in LTP in S1 layer 2/3 neurons. This is consistent with findings that environmental enrichment restores stress-induced reduction of LTP in hippocampal dentate gyrus and prefrontal cortical neurons, and that enrichment does not further increase LTP in non-stressed controls (53, 54).

We also found that environmental enrichment suppressed the ability of S1 layer 2/3 neurons to express either LTP or LTD. These findings are consistent with previous reports, showing that environmental enrichment-induced plasticity occludes further potentiation of S1 layer 2/3 and 4 neurons (55). Similarly, enrichment reduces or blocks the induction of LTP in the dentate gyrus (56–58), perhaps by occluding LTP (59).

### **Environmental enrichment effects on synaptic activity**

Environmental enrichment restored the amplified spontaneous excitatory synaptic transmission in S1 layer 2/3 neurons induced by perinatal fentanyl exposure, and increased it in control mice. The contrasting effects of enrichment on fentanyl and on control mice reflect the multifactorial mechanisms in which enrichment influences cortical synaptic transmission (60). Relevant findings demonstrate that environmental enrichment restores the decreased mEPSC frequency in S1 layer 2/3 neurons induced by sensory deprivation, and increases mEPSC frequency in control, non-deprived mice (61). The mechanisms involved in the increased excitatory synaptic activity induced by perinatal fentanyl exposure and the restoration by environmental enrichment has yet to be determined.

Converging evidence from longitudinal human studies and preclinical models demonstrate that perinatal exposure to opioids results in long-lasting molecular, circuit, network, and behavioral aberrations. Current treatment options are aimed at relieving acute symptoms exhibited by newborns with neonatal opioid withdrawal. No such treatments are available for the developing child or adolescent. Our results provide insights into the underlying circuit changes involved in the lasting anxiety and sensory-related deficits induced by perinatal fentanyl exposure, and suggest that environmental enrichment may be leveraged to ameliorate or reverse the lasting deleterious effects of this early opioid exposure.

## **Acknowledgements**

JBA and LMR conceptualized the project, designed and performed the experiments, analyzed and interpreted the data, and co-wrote the manuscript; MP assisted in data analysis; AK supervised the research, performed analyses, and co-wrote the manuscript. We thank Urja Kuppa for preliminary analysis of miniature excitatory postsynaptic currents.

## **Funding and Disclosures**

This research was supported by the Opioid Use Disorders Initiative: MPowering the State, from the State of Maryland (to AK), NIH/NIDA F31-DA051113 (to JBA), NIH/NIGMS R25-GM055036 (to JBA and LMR), NIH/NIMH F31-MH123066 (to LMR), NIH/NIGMS T32-GM008181 (to LMR), NIH/NINDS T32-NS063391 (to LMR). JBA, LMR, MP, and AK declare no financial conflicts of interest.

## **ORCID**

Jason Bondoc Alipio: <https://orcid.org/0000-0001-9315-345X>

Lace Marie Riggs: <https://orcid.org/0000-0003-4368-4089>

Asaf Keller: <https://orcid.org/0000-0001-8727-663X>

## **References**

1. L. Degenhardt, *et al.*, The global burden of disease attributable to alcohol and drug use in 195 countries and territories, 1990–2016: a systematic analysis for the Global Burden of Disease Study 2016. *Lancet Psychiatry* **5**, 987–1012 (2018).
2. J. K. O'Donnell, J. Halpin, C. L. Mattson, B. A. Goldberger, R. M. Gladden, Deaths Involving Fentanyl, Fentanyl Analogs, and U-47700 — 10 States, July–December 2016. *Mmwr Morbidity Mortal Wkly Rep* **66**, 1197–1202 (2017).
3. P. J. Jannetto, *et al.*, The Fentanyl Epidemic and Evolution of Fentanyl Analogs in the United States and the European Union. *Clin Chem* **65**, 242–253 (2019).
4. J. P. VanHouten, R. A. Rudd, M. F. Ballesteros, K. A. Mack, Drug Overdose Deaths Among Women Aged 30–64 Years — United States, 1999–2017. *Morbidity Mortal Wkly Rep* **68**, 1–5 (2019).
5. S. C. Haight, J. Y. Ko, V. T. Tong, M. K. Bohm, W. M. Callaghan, Opioid use disorder documented at delivery hospitalization — United States, 1999–2014. *Morbidity Mortal Wkly Rep* **67**, 845–849 (2018).
6. V. E. Whiteman, *et al.*, Maternal Opioid Drug Use during Pregnancy and Its Impact on Perinatal Morbidity, Mortality, and the Costs of Medical Care in the United States. *J Pregnancy* **2014**, 1–8 (2014).
7. T. N. A. Winkelman, N. Villapiano, K. B. Kozhimannil, M. M. Davis, S. W. Patrick, Incidence and Costs of Neonatal Abstinence Syndrome Among Infants With Medicaid: 2004–2014. *Pediatrics* **141**, e20173520 (2018).
8. M. B. Sutter, L. Leeman, A. Hsi, Neonatal Opioid Withdrawal Syndrome. *Obstet Gyn Clin N Am* **41**, 317–334 (2014).
9. L. J. Sherman, M. M. Ali, R. Mutter, J. Larson, Mental Disorders Among Children Born With Neonatal Abstinence Syndrome. *Psychiatr Serv* **70**, 151–151 (2019).
10. M. M. de Cubas, T. Field, Children of methadone-dependent women. *Am J Orthopsychiat* **63**, 266–276 (1993).
11. E. Nygaard, K. Slinning, V. Moe, K. B. Walhovd, Behavior and Attention Problems in Eight-Year-Old Children with Prenatal Opiate and Poly-Substance Exposure: A Longitudinal Study. *Plos One* **11**, e0158054 (2016).
12. A. Ornoy, J. Segal, R. Bar-Hamburger, C. Greenbaum, Developmental outcome of school-age children born to mothers with heroin dependency: importance of environmental factors. *Dev Medicine Child Neurology* **43**, 668–675 (2001).
13. K. Kivistö, *et al.*, Somatosensory and auditory processing in opioid-exposed newborns with neonatal abstinence syndrome: a magnetoencephalographic approach. *J Maternal-fetal Neonatal Medicine* **28**, 2015–2019 (2014).
14. A. J. Ayres, Tactile functions. Their relation to hyperactive and perceptual motor behavior. *Am J Occup Ther Official Publ Am Occup Ther Assoc* **18**, 6–11 (1964).
15. C. E. Robertson, S. Baron-Cohen, Sensory perception in autism. *Nat Rev Neurosci* **18**, 671–684 (2017).
16. A. N. Schwartz, L. M. Reyes, L. L. Meschke, K. W. Kintziger, Prenatal Opioid Exposure and ADHD Childhood Symptoms: A Meta-Analysis. *Children* **8**, 106 (2021).

17. J. Nithianantharajah, A. J. Hannan, Enriched environments, experience-dependent plasticity and disorders of the nervous system. *Nat Rev Neurosci* **7**, 697–709 (2006).
18. I. M. S. van Rijzingen, W. H. Gispen, B. M. Spruijt, Postoperative Environmental Enrichment Attenuates Fimbria-Fornix Lesion-Induced Impairments in Morris Maze Performance. *Neurobiol Learn Mem* **67**, 21–28 (1997).
19. M. J. Passineau, E. J. Green, W. D. Dietrich, Therapeutic Effects of Environmental Enrichment on Cognitive Function and Tissue Integrity Following Severe Traumatic Brain Injury in Rats. *Exp Neurol* **168**, 373–384 (2001).
20. J. C. Brenes, M. Padilla, J. Fornaguera, A detailed analysis of open-field habituation and behavioral and neurochemical antidepressant-like effects in postweaning enriched rats. *Behav Brain Res* **197**, 125–137 (2009).
21. M. Bayat, M. D. Sharifi, M. Haghani, M. Shabani, Enriched environment improves synaptic plasticity and cognitive deficiency in chronic cerebral hypoperfused rats. *Brain Res Bull* **119**, 34–40 (2015).
22. L. J. Gaulke, P. J. Horner, A. J. Fink, C. L. McNamara, R. R. Hicks, Environmental enrichment increases progenitor cell survival in the dentate gyrus following lateral fluid percussion injury. *Mol Brain Res* **141**, 138–150 (2005).
23. F. Wei, *et al.*, Experiences affect social behaviors via altering neuronal morphology and oxytocin system. *Psychoneuroendocrino* **129**, 105247 (2021).
24. X. Chen, *et al.*, Gender and environmental effects on regional brain-derived neurotrophic factor expression after experimental traumatic brain injury. *Neuroscience* **135**, 11–17 (2005).
25. M. A. Smail, B. L. Smith, N. Nawreen, J. P. Herman, Differential impact of stress and environmental enrichment on corticolimbic circuits. *Pharmacol Biochem Be* **197**, 172993 (2020).
26. J. B. Alipio, *et al.*, Enduring consequences of perinatal fentanyl exposure in mice. *Addict Biol* **26**, e12895 (2021).
27. J. B. Alipio, *et al.*, Perinatal fentanyl exposure leads to long-lasting impairments in somatosensory circuit function and behavior. *J Neurosci* **41**, 3400–3417 (2021).
28. S. C. Landis, *et al.*, A call for transparent reporting to optimize the predictive value of preclinical research. *Nature* **490**, 187–191 (2012).
29. C. Kilkenney, *et al.*, Animal research: Reporting in vivo experiments: The ARRIVE guidelines. *Brit J Pharmacol* **160**, 1577–1579 (2010).
30. Editorial, Recommendations for the Design and Analysis of In Vivo Electrophysiology Studies. *J Neurosci* **38**, 5837–5839 (2018).
31. J. R. Deuis, L. S. Dvorakova, I. Vetter, Methods used to evaluate pain behaviors in rodents. *Front Mol Neurosci* **10**, 284 (2017).
32. S. R. Chaplan, F. W. Bach, J. W. Pogrel, J. M. Chung, T. L. Yaksh, Quantitative assessment of tactile allodynia in the rat paw. *J Neurosci Meth* **53**, 55–63 (1994).

33. W. J. Dixon, The up-and-down method for small samples. *J Am Stat Assoc* **60**, 967 (1965).
34. J. T. Ting, T. L. Daigle, Q. Chen, G. Feng, Patch-clamp methods and protocols. *Methods Mol Biology* **1183**, 221–242 (2014).
35. H. Toyoda, *et al.*, Roles of the AMPA Receptor Subunit GluA1 but Not GluA2 in Synaptic Potentiation and Activation of ERK in the Anterior Cingulate Cortex. *Mol Pain* **5**, 1744-8069-5–46 (2009).
36. M.-G. Zhao, *et al.*, Roles of NMDA NR2B Subtype Receptor in Prefrontal Long-Term Potentiation and Contextual Fear Memory. *Neuron* **47**, 859–872 (2005).
37. J. Kim, B. E. Alger, Random Response Fluctuations Lead to Spurious Paired-Pulse Facilitation. *J Neurosci* **21**, 9608–9618 (2001).
38. A. L. Hanes, *et al.*, Divergent Synaptic Scaling of Miniature EPSCs following Activity Blockade in Dissociated Neuronal Cultures. *J Neurosci* **40**, 4090–4102 (2020).
39. C. L. Wade, D. J. Schuster, K. M. Domingo, K. F. Kitto, C. A. Fairbanks, Supraspinally-administered agmatine attenuates the development of oral fentanyl self-administration. *Eur J Pharmacol* **587**, 135–140 (2008).
40. C. L. Wade, *et al.*, Effect of Chronic Pain on Fentanyl Self-Administration in Mice. *Plos One* **8**, e79239 (2013).
41. E. T. Kavalali, The mechanisms and functions of spontaneous neurotransmitter release. *Nat Rev Neurosci* **16**, 5–16 (2015).
42. X.-S. Wu, *et al.*, The Origin of Quantal Size Variation: Vesicular Glutamate Concentration Plays a Significant Role. *J Neurosci* **27**, 3046–3056 (2007).
43. F. Montarolo, *et al.*, NURR1 deficiency is associated to ADHD-like phenotypes in mice. *Transl Psychiat* **9**, 207 (2019).
44. A. Ahmadelipour, S. Ghodrati-Jaldbakhan, S. A. Samaei, A. Rashidy-Pour, Deleterious effects of prenatal exposure to morphine on the spatial learning and hippocampal BDNF and long-term potentiation in juvenile rats: Beneficial influences of postnatal treadmill exercise and enriched environment. *Neurobiol Learn Mem* **147**, 54–64 (2018).
45. L. Niu, *et al.*, Impaired in vivo synaptic plasticity in dentate gyrus and spatial memory in juvenile rats induced by prenatal morphine exposure. *Hippocampus* **19**, 649–657 (2009).
46. N. Yazdanfar, A. Farnam, S. Sadigh-Eteghad, J. Mahmoudi, A. Sarkaki, Enriched environment and social isolation differentially modulate addiction-related behaviors in male offspring of morphine-addicted dams: The possible role of  $\mu$ -opioid receptors and  $\Delta$ FosB in the brain reward pathway. *Brain Res Bull* **170**, 98–105 (2021).
47. C. J. Botanas, *et al.*, Rearing in an enriched environment attenuated hyperactivity and inattention in the Spontaneously Hypertensive Rats, an animal model of Attention-Deficit Hyperactivity Disorder. *Physiol Behav* **155**, 30–37 (2016).
48. A. Korkhin, S. Zubedat, S. Aga-Mizrachi, A. Avital, Developmental effects of environmental enrichment on selective and auditory sustained attention. *Psychoneuroendocrino* **111**, 104479 (2020).



49. R. Mychasiuk, A. Muhammad, B. Kolb, Environmental enrichment alters structural plasticity of the adolescent brain but does not remediate the effects of prenatal nicotine exposure. *Synapse* **68**, 293–305 (2014).
50. D. Dow-Edwards, M. Iijima, S. Stephenson, A. Jackson, J. Weedon, The effects of prenatal cocaine, post-weaning housing and sex on conditioned place preference in adolescent rats. *Psychopharmacology* **231**, 1543–1555 (2014).
51. C. L. Ryan, B. A. Pappas, Prenatal exposure to antiadrenergic antihypertensive drugs: Effects on neurobehavioral development and the behavioral consequences of enriched rearing. *Neurotoxicol Teratol* **12**, 359–366 (1990).
52. A. Wille-Bille, *et al.*, Early exposure to environmental enrichment modulates the effects of prenatal ethanol exposure upon opioid gene expression and adolescent ethanol intake. *Neuropharmacology* **165**, 107917 (2020).
53. Y. Wu, R. Mitra, Prefrontal-hippocampus plasticity reinstated by an enriched environment during stress. *Neurosci Res* (2020) <https://doi.org/10.1016/j.neures.2020.07.004>.
54. H. Wang, X. Xu, X. Xu, J. Gao, T. Zhang, Enriched Environment and Social Isolation Affect Cognition Ability via Altering Excitatory and Inhibitory Synaptic Density in Mice Hippocampus. *Neurochem Res* **45**, 2417–2432 (2020).
55. P. Mégevand, *et al.*, Long-Term Plasticity in Mouse Sensorimotor Circuits after Rhythmic Whisker Stimulation. *J Neurosci* **29**, 5326–5335 (2009).
56. G. I. Irvine, B. Logan, M. Eckert, W. C. Abraham, Enriched environment exposure regulates excitability, synaptic transmission, and LTP in the dentate gyrus of freely moving rats. *Hippocampus* **16**, 149–160 (2006).
57. R. Feng, *et al.*, Deficient Neurogenesis in Forebrain-Specific Presenilin-1 Knockout Mice Is Associated with Reduced Clearance of Hippocampal Memory Traces. *Neuron* **32**, 911–926 (2001).
58. M. J. Eckert, D. K. Bilkey, W. C. Abraham, Altered Plasticity in Hippocampal CA1, But Not Dentate Gyrus, Following Long-Term Environmental Enrichment. *J Neurophysiol* **103**, 3320–3329 (2010).
59. T. C. Foster, J. Gagne, G. Massicotte, Mechanism of altered synaptic strength due to experience: relation to long-term potentiation. *Brain Res* **736**, 243–250 (1996).
60. L. Baroncelli, *et al.*, Nurturing brain plasticity: impact of environmental enrichment. *Cell Death Differ* **17**, 1092–1103 (2010).
61. J.-J. Zheng, *et al.*, Oxytocin mediates early experience-dependent cross-modal plasticity in the sensory cortices. *Nat Neurosci* **17**, 391–399 (2014).
